# Supplementary material for: Spectroscopic and crystallographic characterization of a new cathinone derivative: 1-phenyl-2-(butylamino)hexan-1-one hydrochloride (N-butylhexedrone)
Source: Springer Nature journal article supplement (doi:10.1007/s11419-020-00525-y), 2020-02-11
Supplement: MOESM1 [file 17675636]

### Forensic Toxicology – Rojkiewicz *et al.* - Electronic supplementary material

**Spectroscopic and crystallographic characterization of cathinone derivative: 1-phenyl-2-(butylamino)hexan-1-one hydrochloride**

Marcin Rojkiewicz1,*, Piotr Kuś1, Joachim Kusz2, Maria Książek2, Aleksander Sochanik3

1 University of Silesia, Institute of Chemistry, 9 Szkolna Street, 40-006 Katowice, Poland

2 University of Silesia, Institute of Physics, 1 75 Pułku Piechoty Street, 41-500 Chorzów, Poland

3 Center for Translational Research and Molecular Biology of Cancer, Maria Skłodowska-Curie Memorial Cancer Centre and Institute of Oncology, 44-100 Gliwice, Poland

* Corresponding author

E-mail address: *marcin.rojkiewicz@us.edu.pl*

**Fig. S1** Electrospray ionization mass spectrum for compound **1** (*N*-butylhexedrone)

**Fig. S2** Electrospray ionization tandem mass spectrum for compound **1**


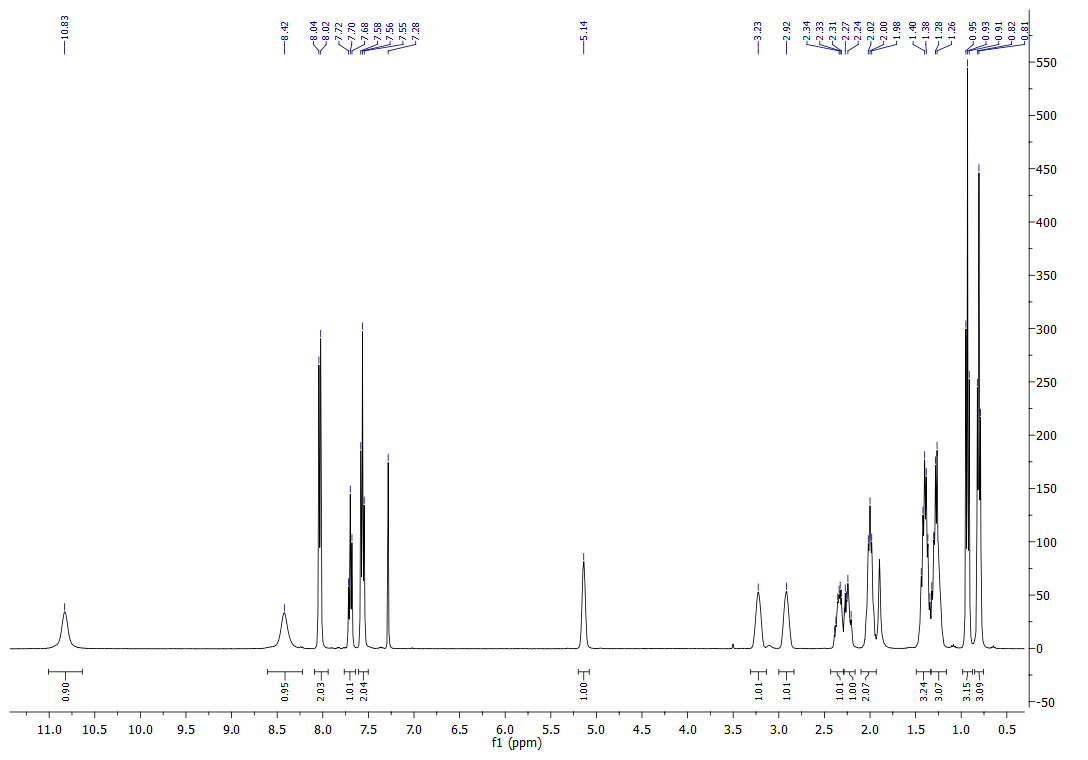


**Fig. S3** 1H nuclear magnetic resonance spectrum for compound **1**


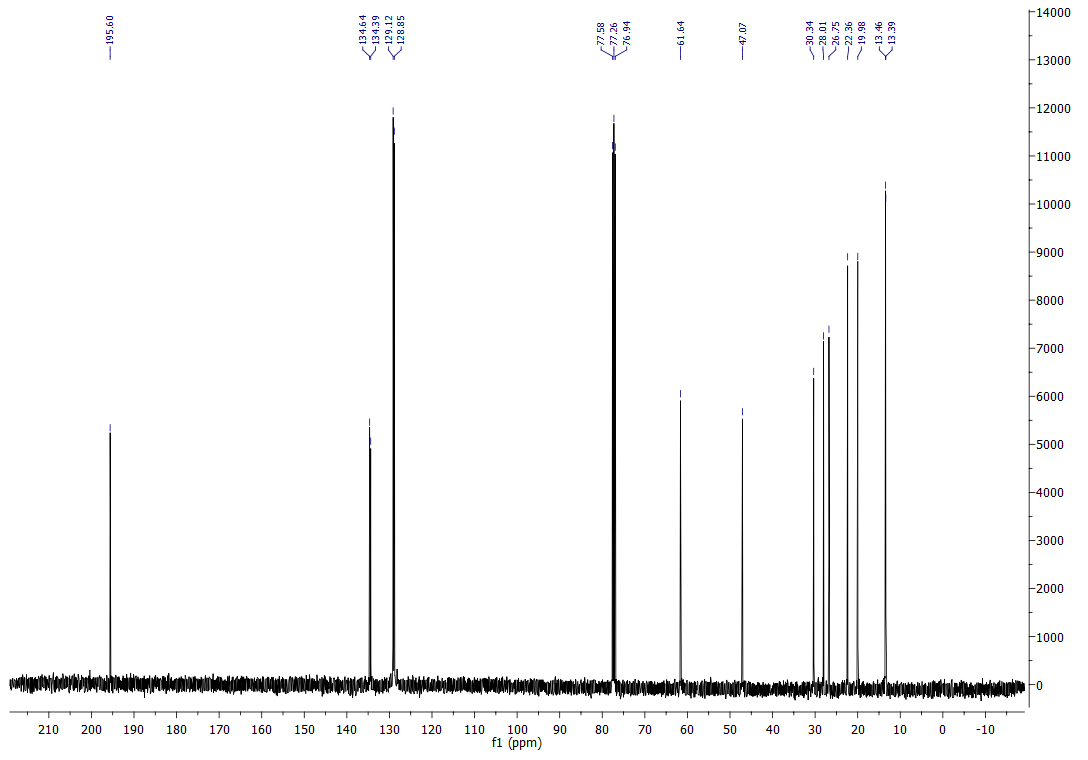


**Fig. S4** 13C nuclear magnetic resonance spectrum for compound **1**





**Fig. S5** Infrared spectrum for compound **1**





**Fig. S6** Raman spectrum for compound **1**





**Fig. S7** Ultraviolet-visible spectrum for compound **1**


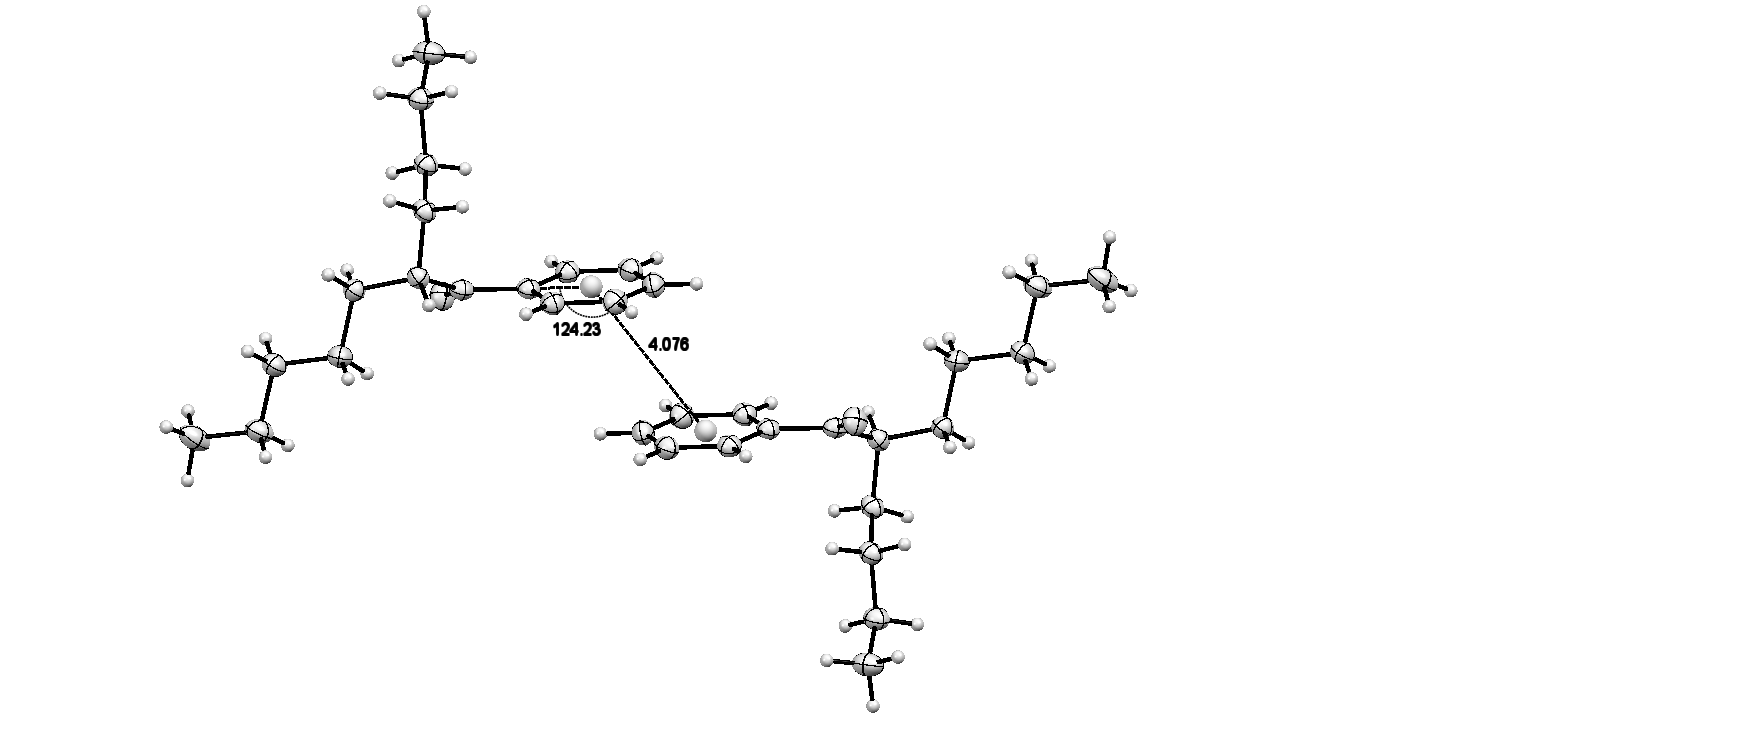


**Fig. S8** π···π Interactions between phenyl rings in crystals of compound **1**, form B


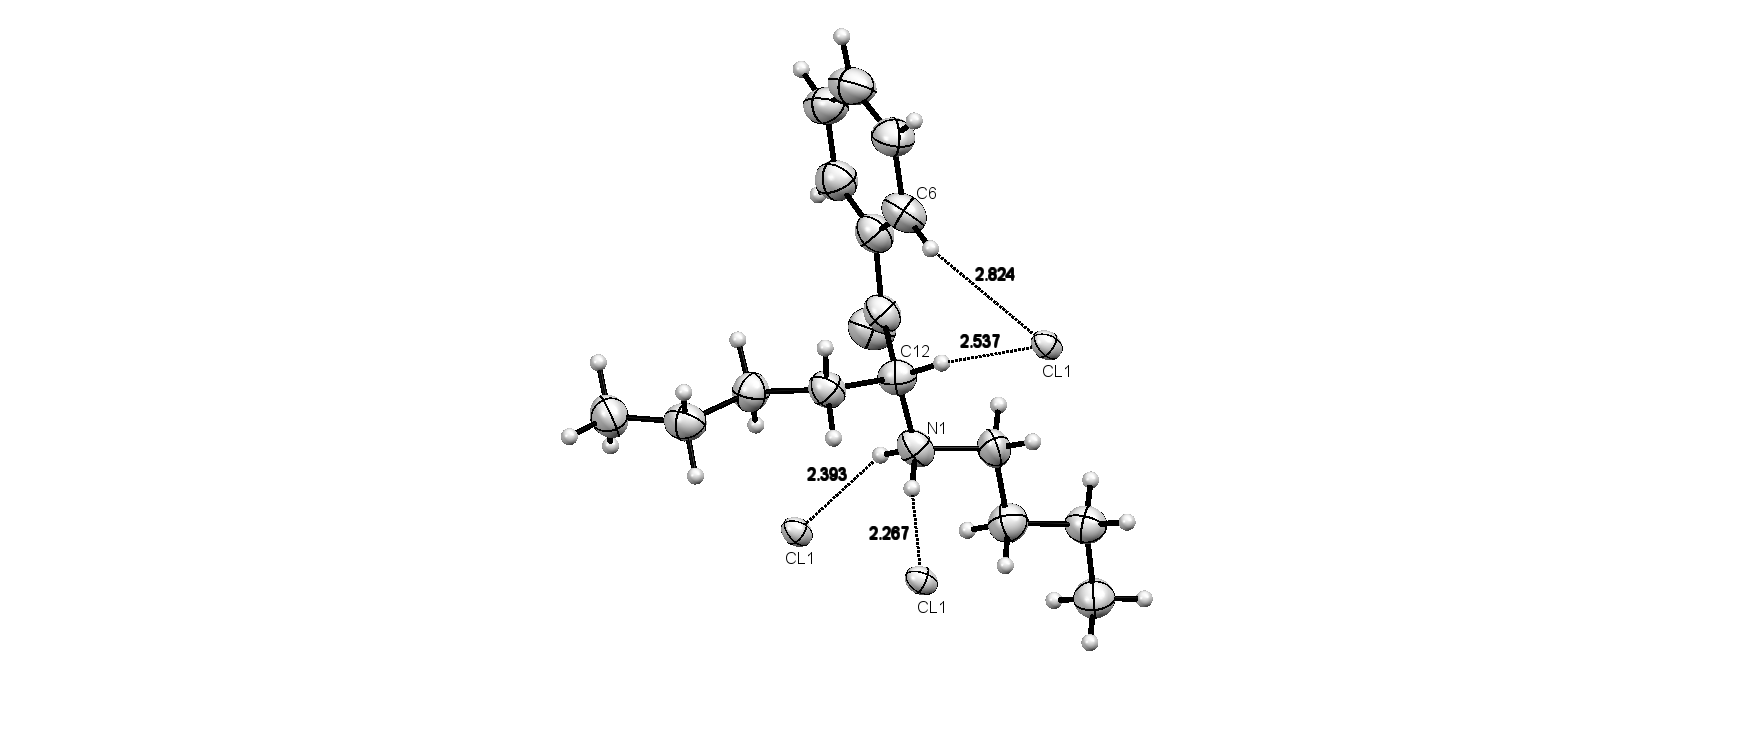


**Fig. S9** Short distances occurring in the structure of compound **1**, form A
